# Supplementary material for: Coordination polymers with free Brønsted acid sites for selective catalysis
Source: Royal Society of Chemistry journal article supplement (doi:10.1039/c4nj01898b), 2014-12-02

# Supporting Information for

## Coordination Polymers with free Brønsted acid Sites for Selective Catalysis

**Lu-Fang Ma<sup>a,b</sup>, Zhen-Zhen Shi<sup>c</sup>, Fei-Fei Li<sup>c</sup>, Jian Zhang<sup>\*a</sup>, and Li-Ya Wang<sup>\*b</sup>**

<sup>a</sup> *State Key Laboratory of Structural Chemistry, Fujian Institute of Research on the Structure of Matter, the Chinese Academy of Sciences, Fuzhou, Fujian 350002, P. R. China.*

<sup>b</sup> *College of Chemistry and Chemical Engineering, Luoyang Normal University, Luoyang 471022, P. R. China*

<sup>c</sup> *Department of Physics and Chemistry, Henan Polytechnic University, Jiaozuo, 454000, P. R. China*

**Materials and instrumentation:** All reagents were commercially available and were used as received without further purification. Elemental analyses for carbon, hydrogen and nitrogen atoms were performed on a Flash 2000 organic elemental analyzer. The infrared spectra ( $4000 \sim 600 \text{ cm}^{-1}$ ) were recorded on a NICOLET 6700 FT-IR spectrometer. Thermalgravimetric analyses were performed on a SII EXStar6000 TG/DTA6300 analyzer heated from 30 to 900 °C under nitrogen. Powder X-ray diffraction (PXRD) measurements were performed on a Bruker D8-ADVANCE X-ray diffractometer with Cu  $K\alpha$  radiation.

**X-ray diffraction analysis.** Suitable single crystals of **1-2** were carefully selected under an optical microscope and glued to thin glass fibers. Whereafter, single-crystal X-ray diffraction analyses were performed on a computer-controlled X-ray diffractometer with graphite monochromated Mo  $K\alpha$  radiation ( $\lambda_{\text{Mo-K}\alpha} = 0.71073 \text{ \AA}$ ) at  $T = 293 \text{ K}$ . The structures were solved using the direct method and refined by full-matrix least-squares methods on  $F^2$  by using the SHELX-97 program package.

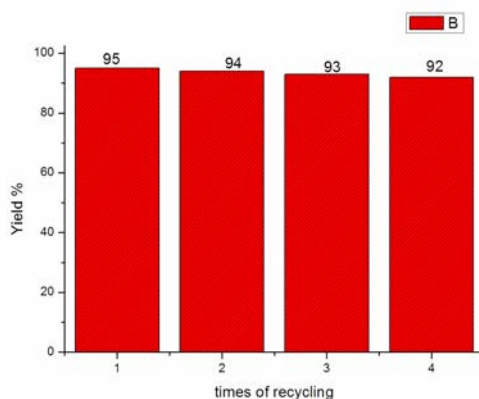

**Figure S1.** Picture showing the product yields of recycle use of catalyst 1.

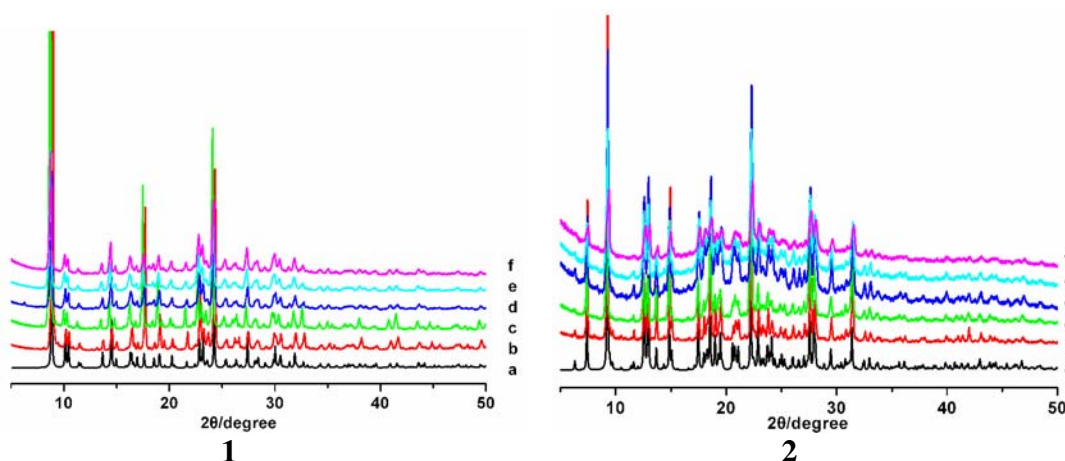

**Figure S2.** XRD patterns of **1** and **2**: (a) the simulated XRD pattern, (b) dehydrated solid obtained on heating at 140 °C for 4 h under vacuum, (c) after the first recycling, (d) after the second recycling, (e) after the third recycling and (f) after the fourth recycling.

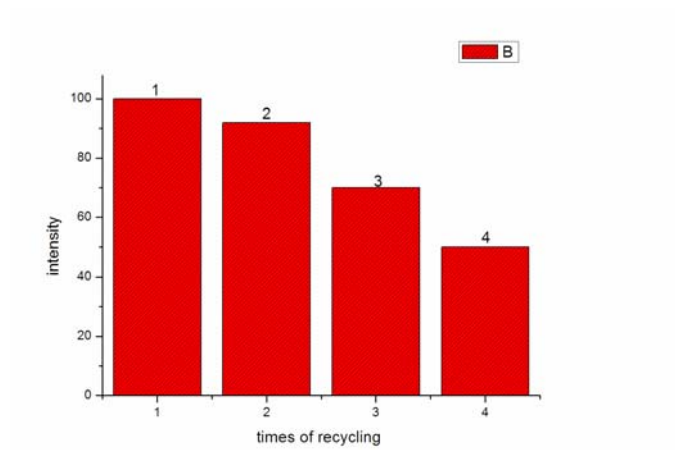

**Figure S3.** Picture showing the variation of intensity of recycle use of catalyst 1.

## NMR data

1)

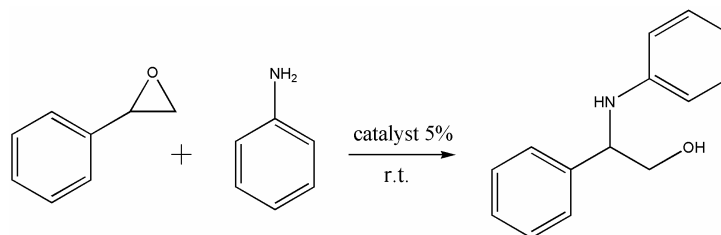

2-phenyl-2-(phenylamino)ethanol:  $^1\text{H}$  NMR (400 MHz,  $\text{CDCl}_3$ )  $\delta$ : 7.35–7.24 (m, 5H), 7.09 (t,  $J = 8.0$  Hz, 2H), 6.67 (t,  $J = 8.0$  Hz, 1H), 6.55 (d,  $J = 8.0$  Hz, 2H), 4.49 (br s, 1H), 3.91–3.94 (m, 1H), 3.72–3.76 (dd,  $J = 4.0$  Hz, 1H), 1.84 (br s, 1H).  $^{13}\text{C}$  NMR ( $\text{CDCl}_3$ , 400 MHz)  $\delta$ : 60.00, 67.45, 113.99, 118.02, 126.86, 127.72, 128.94, 129.28, 140.28, 147.38.

2)

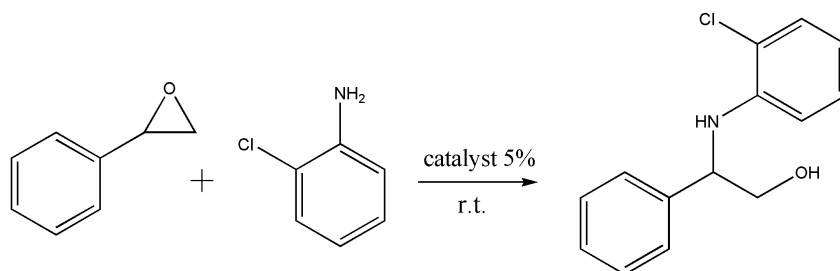

2-(o-chlorophenylamino)-2-phenylethanol:  $^1\text{H}$  NMR (400 MHz,  $\text{CDCl}_3$ )  $\delta$  7.34–7.28 (m, 4H), 7.24 (d,  $J = 8.0$  Hz, 2H), 6.95 (t,  $J = 8.0$  Hz, 1H), 6.60 (d,  $J = 8.0$  Hz, 1H), 6.42 (d,  $J = 8.0$  Hz, 1H), 5.15 (br s, 1H), 5.54 (d,  $J = 4.0$  Hz, 1H), 3.97 (t,  $J = 4.0$  Hz, 1H), 3.82 (s, 1H), 1.82 (br s, 1H).  $^{13}\text{C}$  NMR ( $\text{CDCl}_3$ , 400 MHz)  $\delta$ : 59.81, 67.47, 112.99, 117.97, 119.89, 126.78, 127.77, 127.91, 129.04, 129.24, 139.67, 143.19.

3)

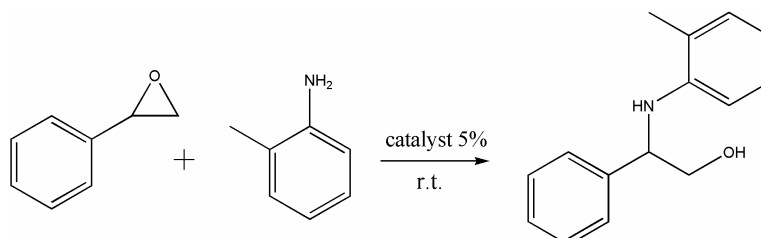

2-(o-methylphenylamino)-2-phenylethanol:  $^1\text{H}$  NMR (400 MHz,  $\text{CDCl}_3$ )  $\delta$  7.31–7.25 (m, 5H), 7.05 (d,  $J = 8.0$  Hz, 1H), 6.94 (t,  $J = 8.0$  Hz, 1H), 6.63 (t,  $J = 4.0$  Hz, 1H), 6.37 (d,  $J = 8.0$  Hz, 1H), 4.54 (t,  $J = 4.0$  Hz, 1H), 3.97 (dd,  $J = 4.0$  Hz, 1H), 3.79 (dd,  $J = 4.0, 8.0$  Hz, 1H), 2.27 (s, 3H), 1.75 (br s, 1H).  $^{13}\text{C}$

NMR (CDCl<sub>3</sub>, 400 MHz)  $\delta$ : 17.37, 59.94, 67.64, 111.64, 117.66, 122.70, 126.80, 127.11, 127.74, 128.97, 130.23, 140.36, 145.26.

4)

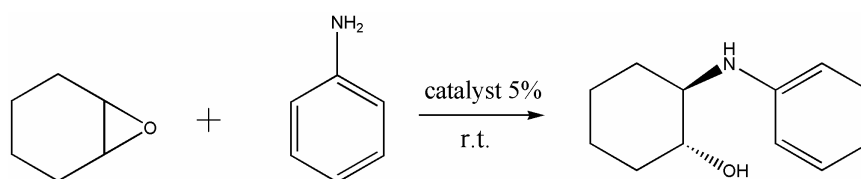

trans-2-(phenylamino)cyclohexanol: <sup>1</sup>H NMR (400 MHz, CDCl<sub>3</sub>)  $\delta$  7.23–7.15 (m, 2H), 6.75–6.69 (m, 3H), 3.35–3.31 (m, 1H), 3.14–3.09 (m, 1H), 3.02 (br s, 1H), 2.21–2.08 (m, 2H), 1.77–1.69 (m, 2H), 1.42–1.03 (m, 6H). <sup>13</sup>C NMR (CDCl<sub>3</sub>, 400 MHz)  $\delta$ : 24.36, 25.08, 60.19, 74.56, 114.44, 118.38, 129.41, 147.94.

5)

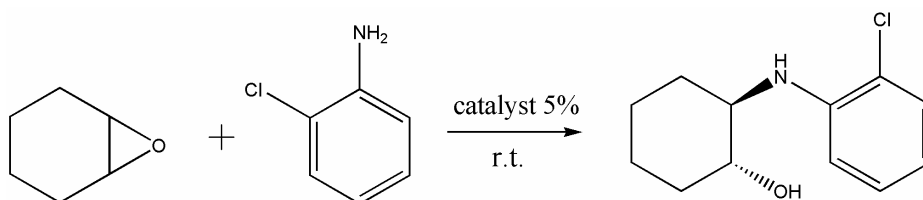

trans-2-(o-chlorophenylamino)cyclohexanol: <sup>1</sup>H NMR (400 MHz, CDCl<sub>3</sub>)  $\delta$  7.25 (d, *J* = 4.0 Hz, 1H), 7.12 (t, *J* = 4.0 Hz, 1H), 6.84 (d, *J* = 8.0 Hz, 1H), 6.65 (t, *J* = 4.0 Hz, 1H), 4.06 (br s, 1H), 3.46 (t, *J* = 8.0 Hz, 1H), 3.20 (s, 1H), 2.59 (s, 1H), 2.15–2.07 (m, 2H), 1.78–1.74 (m, 2H), 1.44–1.12 (m, 6H). <sup>13</sup>C NMR (CDCl<sub>3</sub>, 400 MHz)  $\delta$ : 24.33, 25.10, 31.84, 33.29, 60.00, 74.71, 113.02, 118.20, 120.43, 127.96, 129.47, 143.97.

6)

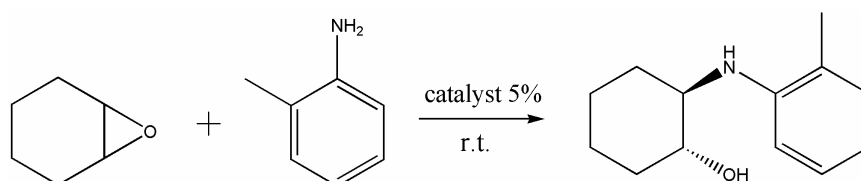

trans-2-(o-methylphenylamino)cyclohexanol: <sup>1</sup>H NMR (400 MHz, CDCl<sub>3</sub>)  $\delta$  7.13–7.06 (m, 2H), 6.77 (d, *J* = 8.0 Hz, 1H), 6.69 (t, *J* = 8.0 Hz, 1H), 3.42 (dd, *J* = 8.0 Hz, 1H), 3.21 (dd, *J* = 8.0 Hz, 1H), 2.73 (br s, 1H), 2.16 (s, 3H), 2.13 (s, 2H), 1.79–1.74 (m, 2H), 1.43–1.11 (m, 6H). <sup>13</sup>C NMR (CDCl<sub>3</sub>, 400 MHz)  $\delta$ : 17.81, 24.44, 25.18, 32.03, 33.38, 60.03, 74.79, 111.74, 118.02, 123.24, 127.30, 130.56, 145.87.

7)

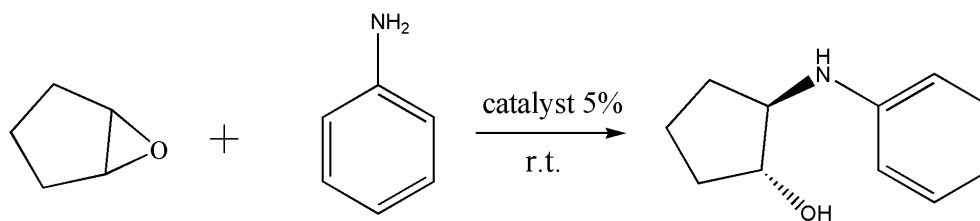

trans-2-(phenylamino)cyclopentanol:  $^1\text{H}$  NMR (400 MHz,  $\text{CDCl}_3$ )  $\delta$  7.20–7.16 (m, 2H), 6.73–6.66 (m, 3H), 4.07 (t,  $J = 4.0$  Hz, 1H), 3.62 (t,  $J = 4.0$  Hz, 1H), 2.31 (s, 1H), 2.02–1.37 (m, 6H).  $^{13}\text{C}$  NMR ( $\text{CDCl}_3$ , 400 MHz)  $\delta$ : 21.19, 31.36, 33.09, 62.25, 78.45, 113.45, 117.67, 129.45, 147.89.

8)

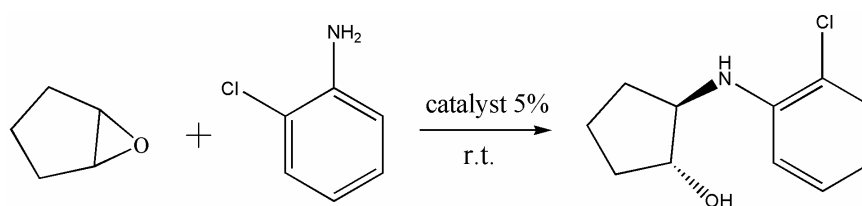

trans-2-(o-chlorophenylamino)cyclopentanol:  $^1\text{H}$  NMR (400 MHz,  $\text{CDCl}_3$ )  $\delta$  7.23 (d,  $J = 8.0$  Hz, 2H), 7.14 (t,  $J = 8.0$  Hz, 1H), 6.81 (d,  $J = 8.0$  Hz, 1H), 6.63 (t,  $J = 8.0$  Hz, 1H), 4.20 (br s, 1H), 4.11 (s, 1H), 3.66 (s, 1H), 2.59 (s, 1H), 2.36–2.27 (m, 1H), 2.07–2.00 (m, 1H), 1.98–1.47 (m, 6H).  $^{13}\text{C}$  NMR ( $\text{CDCl}_3$ , 400 MHz)  $\delta$ : 21.33, 31.47, 33.30, 61.96, 78.40, 112.26, 117.47, 119.31, 127.97, 129.28, 143.70.

9)

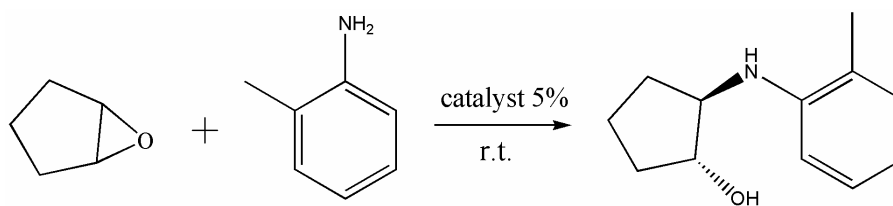

trans-2-(o-methylphenylamino)cyclopentanol:  $^1\text{H}$  NMR (400 MHz,  $\text{CDCl}_3$ )  $\delta$  7.15–7.11 (m, 1H), 7.06–7.04 (m, 1H), 6.74 (d,  $J = 8.0$  Hz, 1H), 6.67 (d,  $J = 8.0$  Hz, 1H), 4.10 (dd,  $J = 4.0, 8.0$  Hz, 1H), 3.67 (dd,  $J = 4.0, 8.0$  Hz, 1H), 2.35–2.30 (m, 1s), 2.28 (s, 3H), 2.05–2.01 (m, 1H), 1.98–1.38 (m, 5H).  $^{13}\text{C}$  NMR ( $\text{CDCl}_3$ , 400 MHz)  $\delta$ : 17.63, 21.25, 31.62, 33.11, 62.07, 78.42, 110.77, 117.20, 122.20, 127.26, 130.26, 145.75.

# NMR Spectra

## 1. 2-phenyl-2-(phenylamino)ethanol

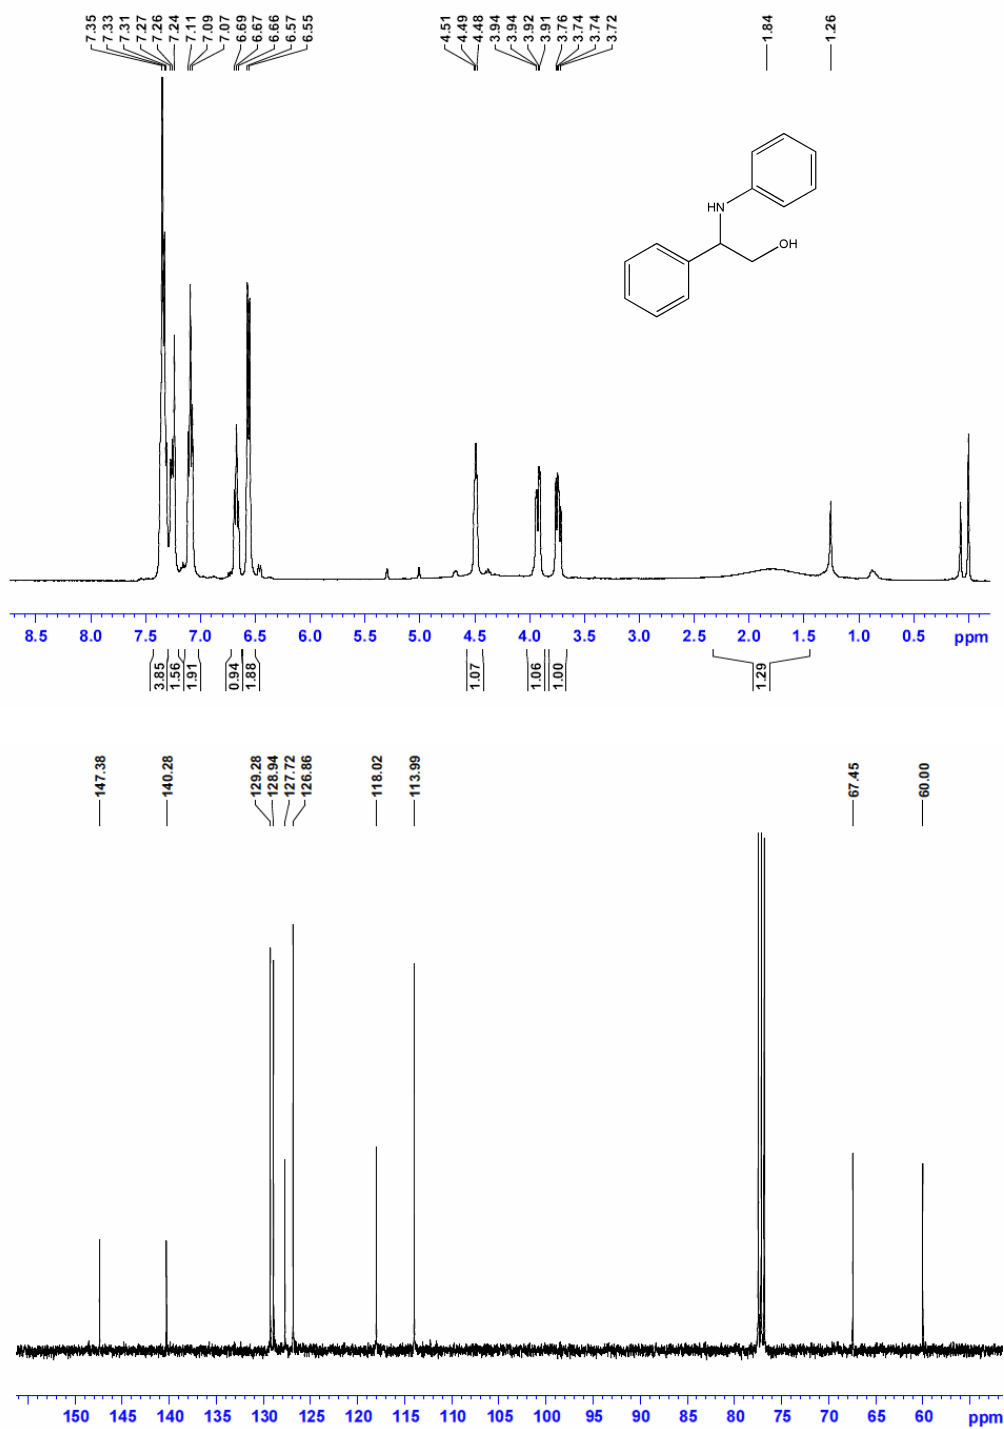

2. 2-(o-chlorophenylamino)-2-phenylethanol

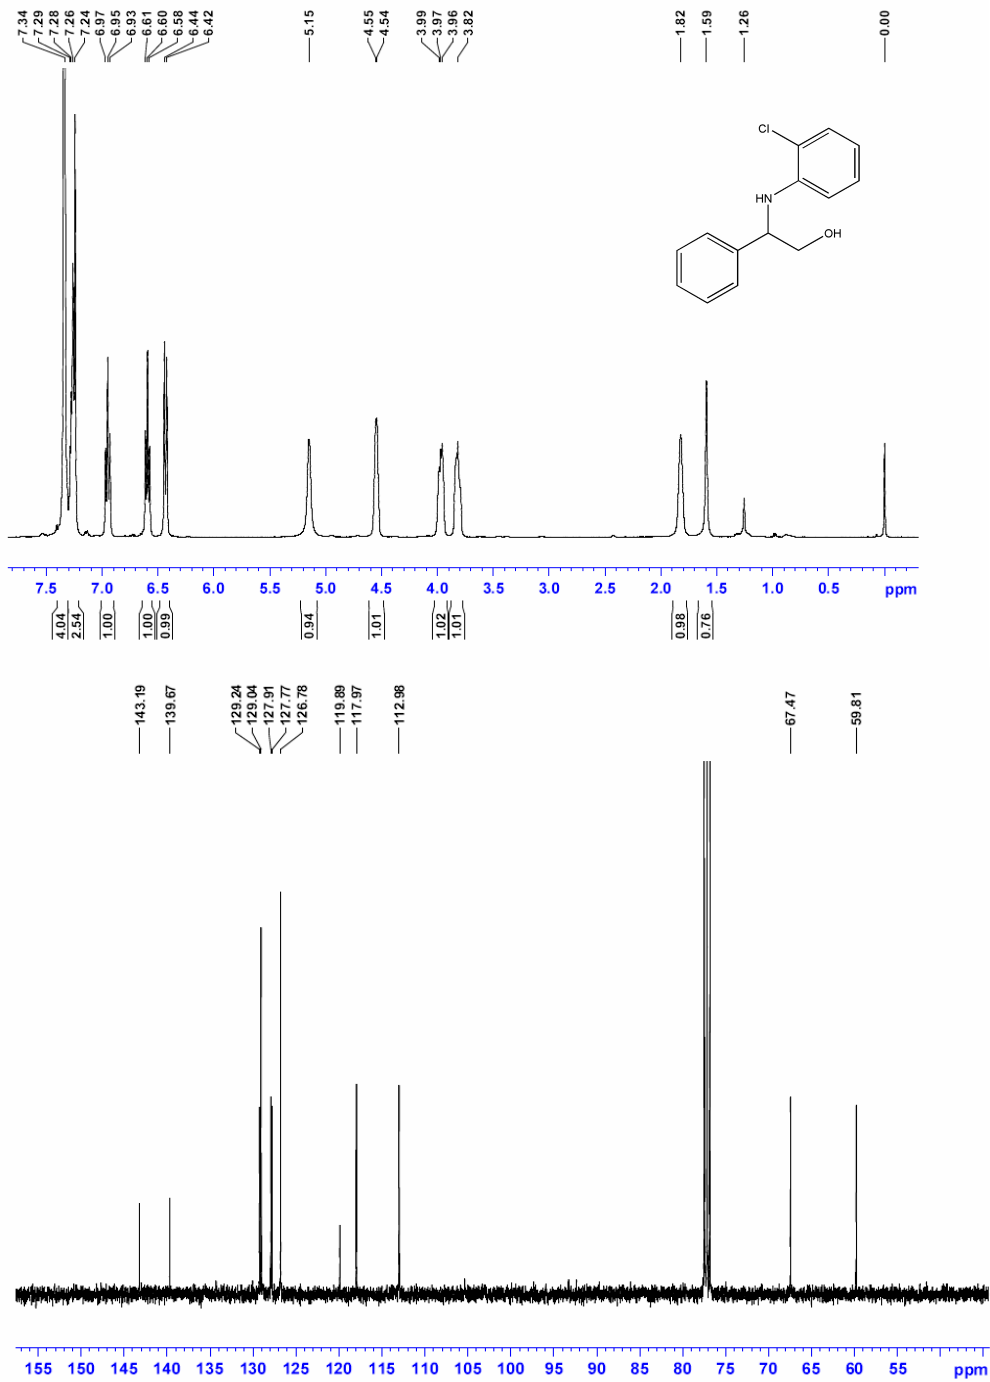



### 3. 2-(o-methylphenylamino)-2-phenylethanol

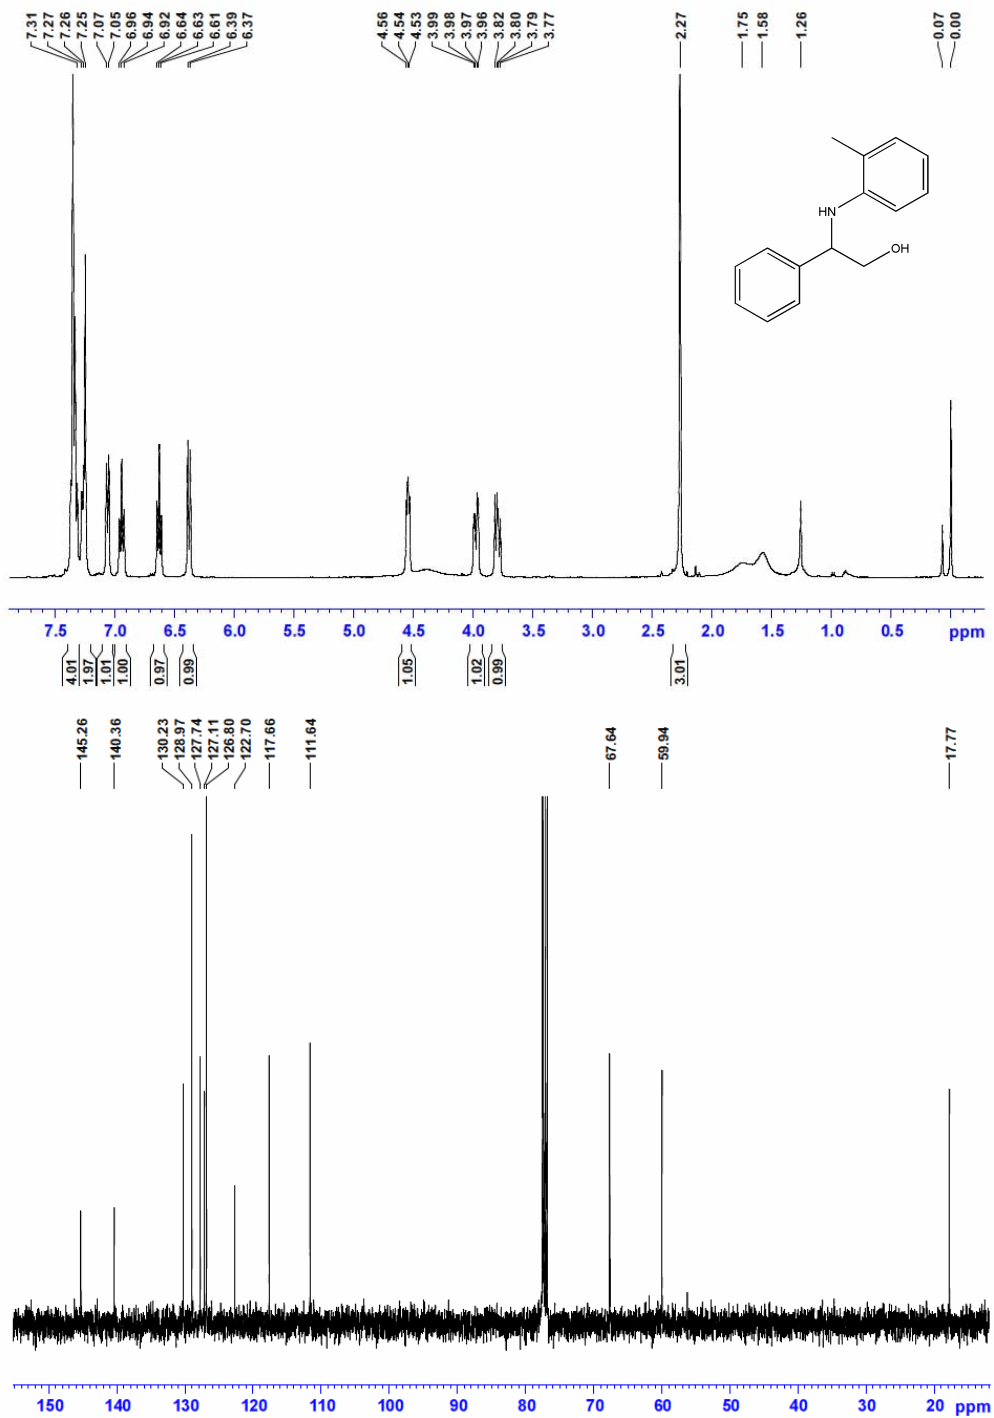

4. trans-(2-(phenylamino)cyclohexanol

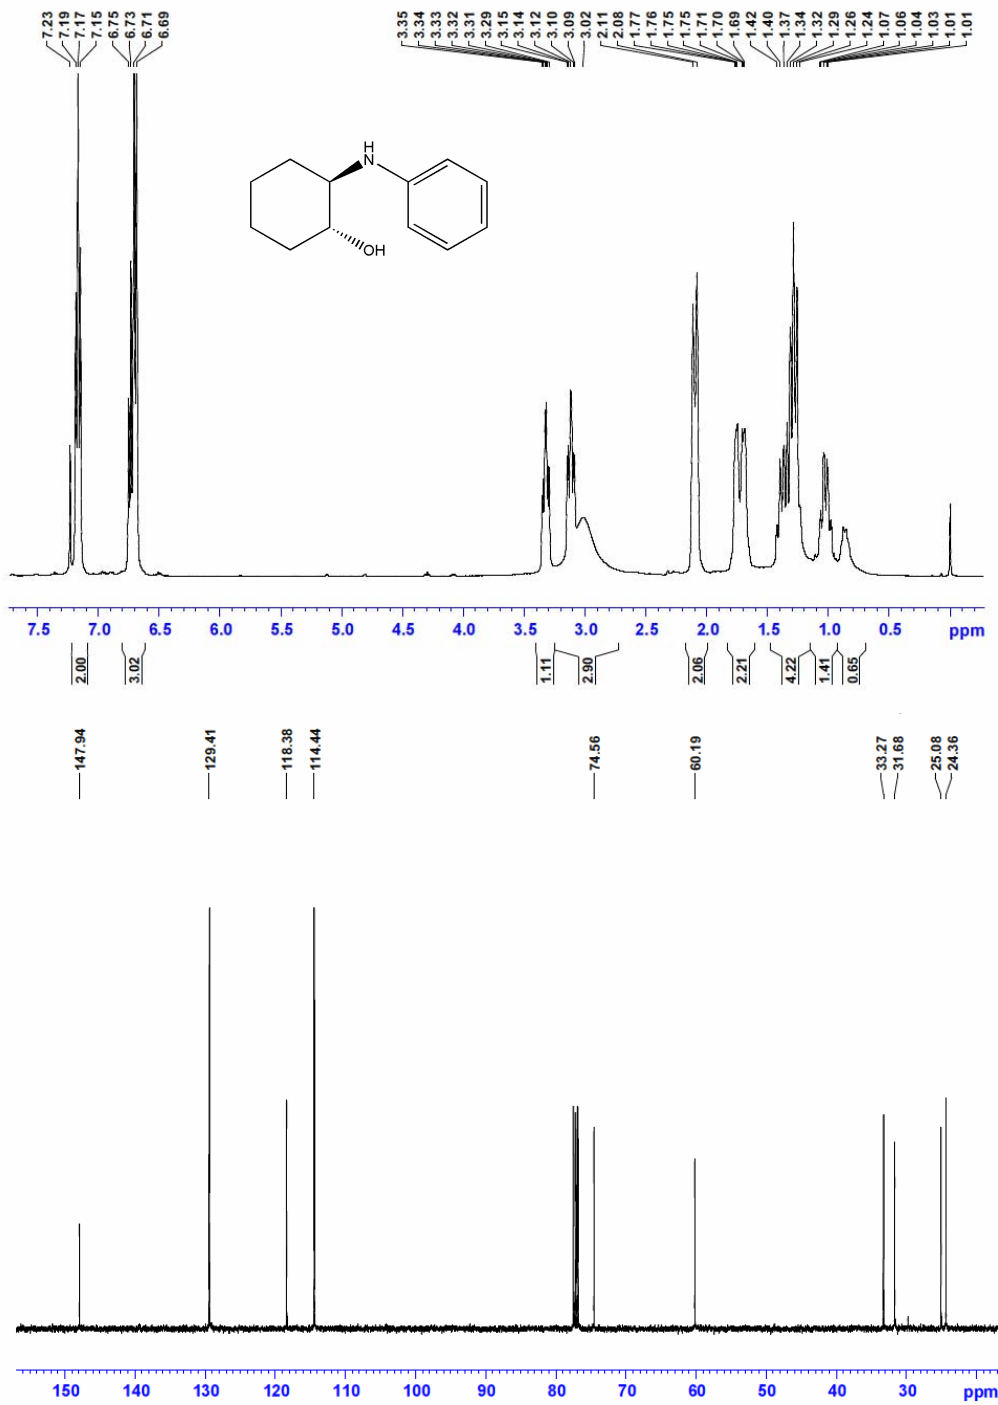

5. tran-2-(o-chlorophenylamino)cyclohexanol

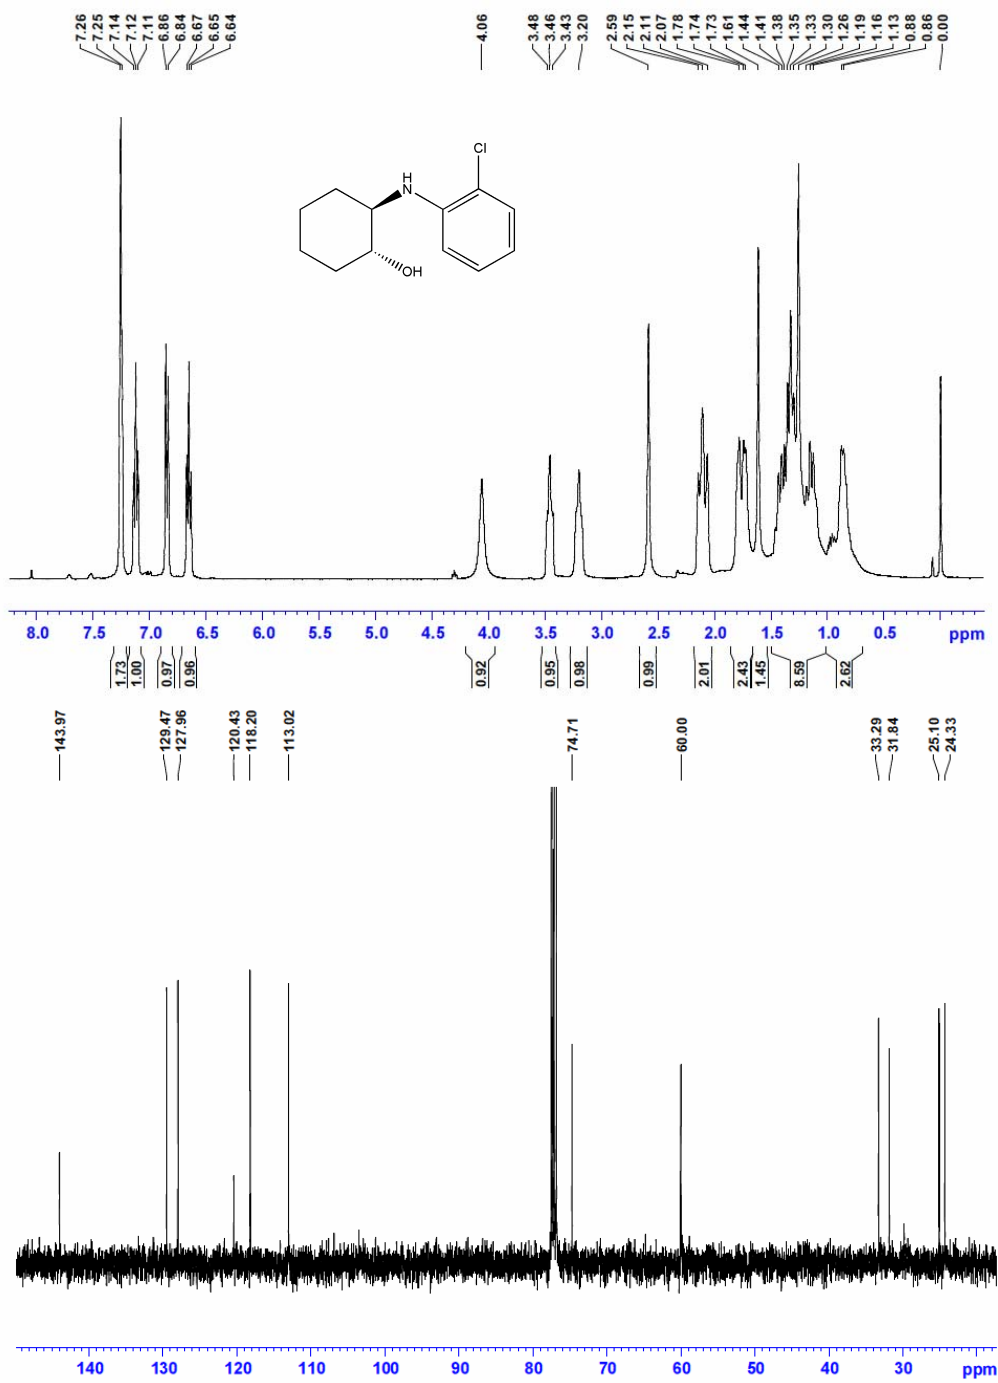

6. trans-2-(o-methylphenylamino)cyclohexanol

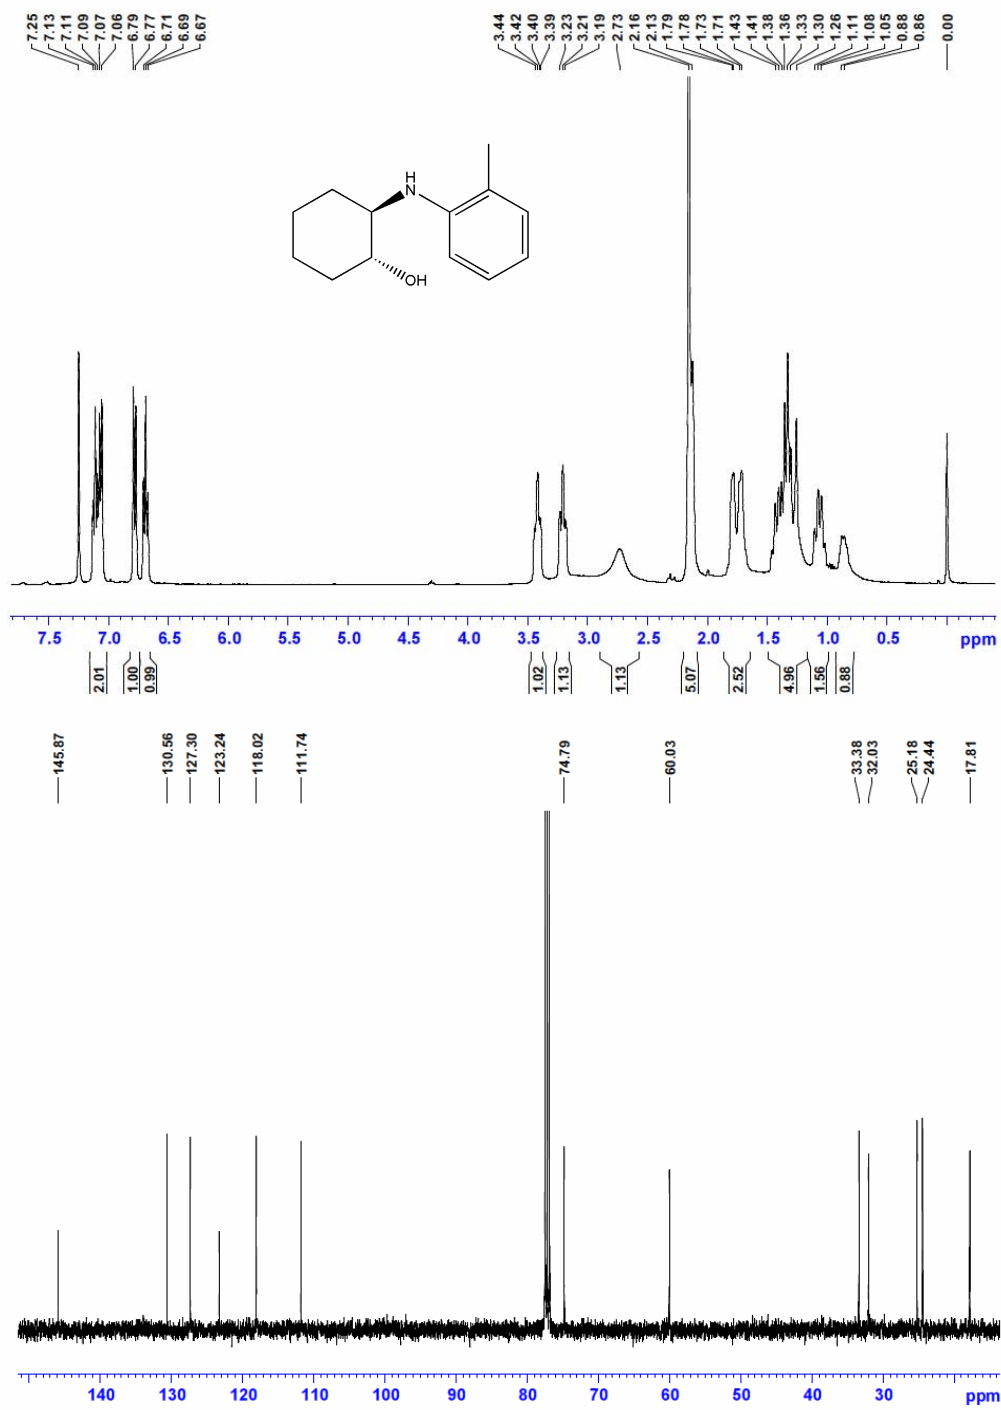

7. trans-2-(phenylamino)cyclopentanol

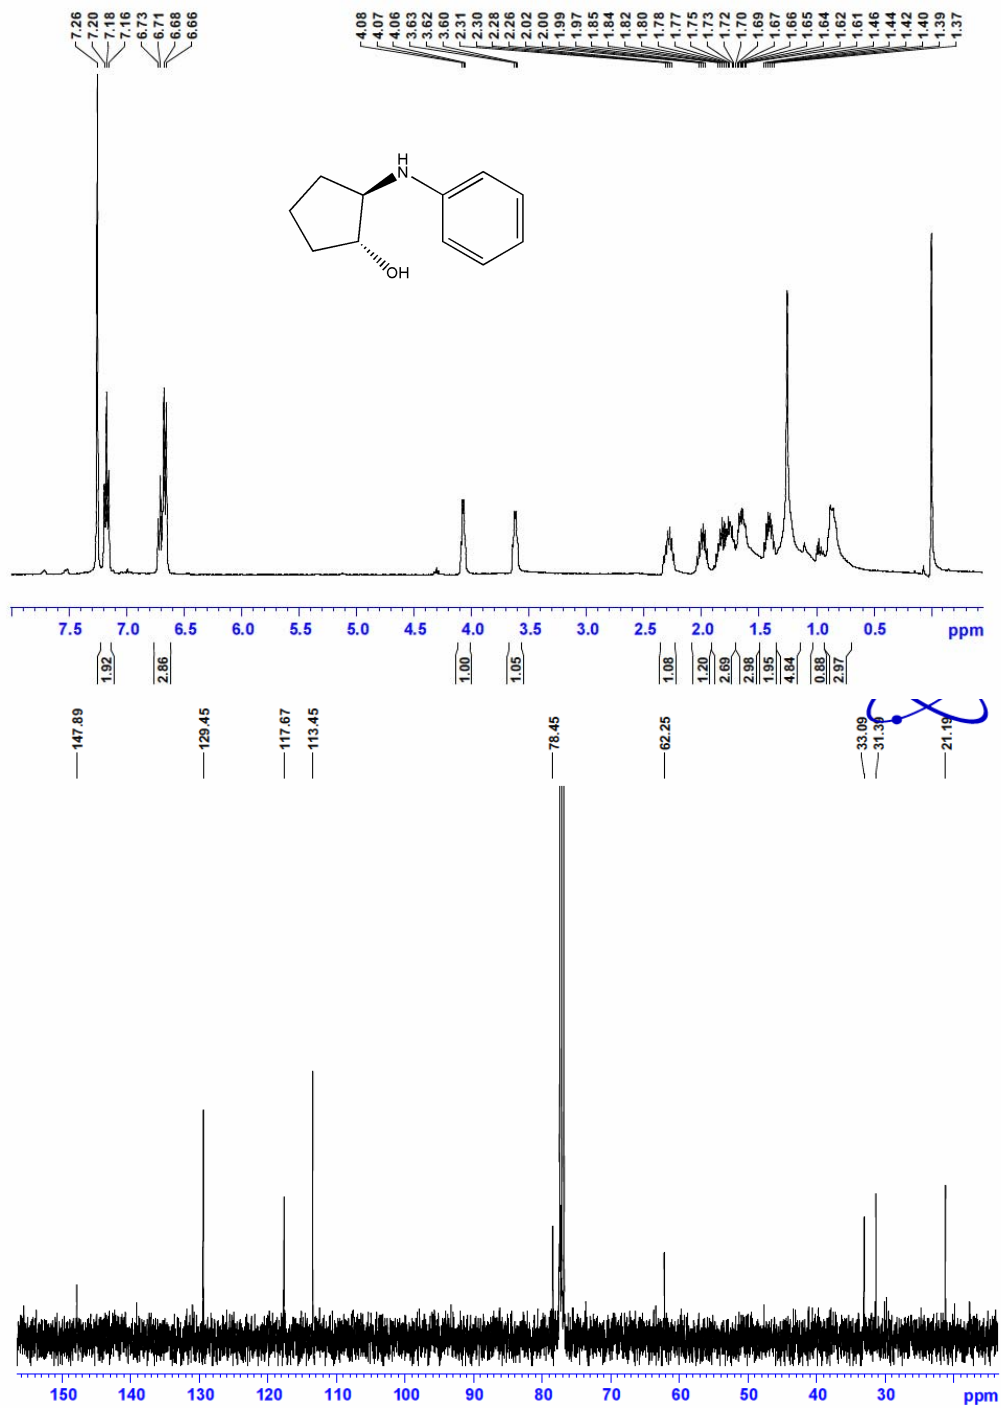

8. trans-2-(o-chlorophenylamino)cyclopentanol

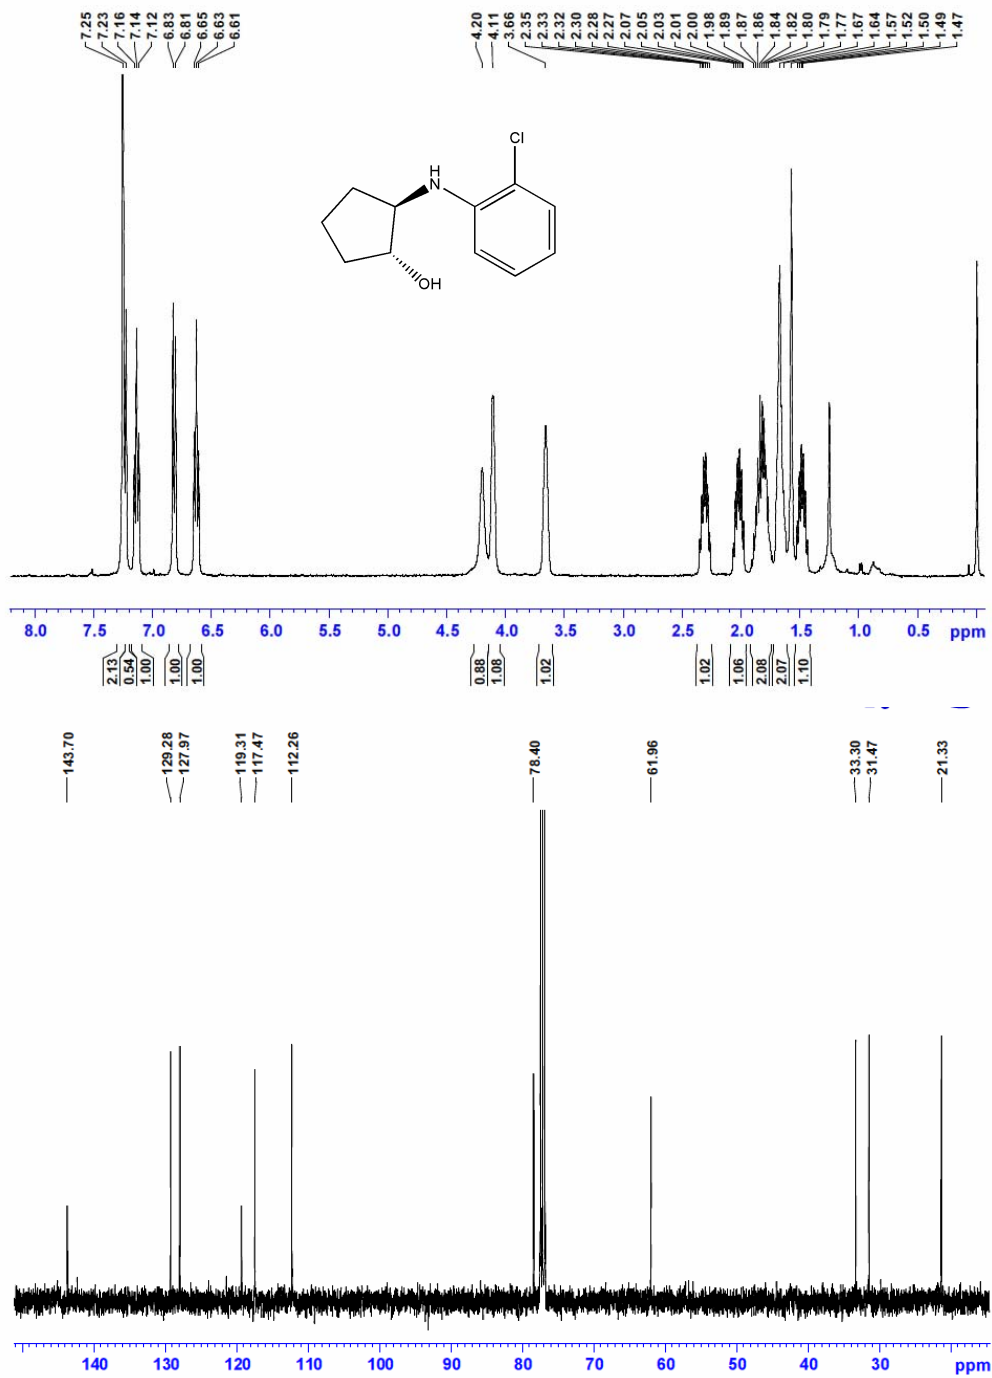

9. trans-2-(o-methylphenylamino)cyclopentanol

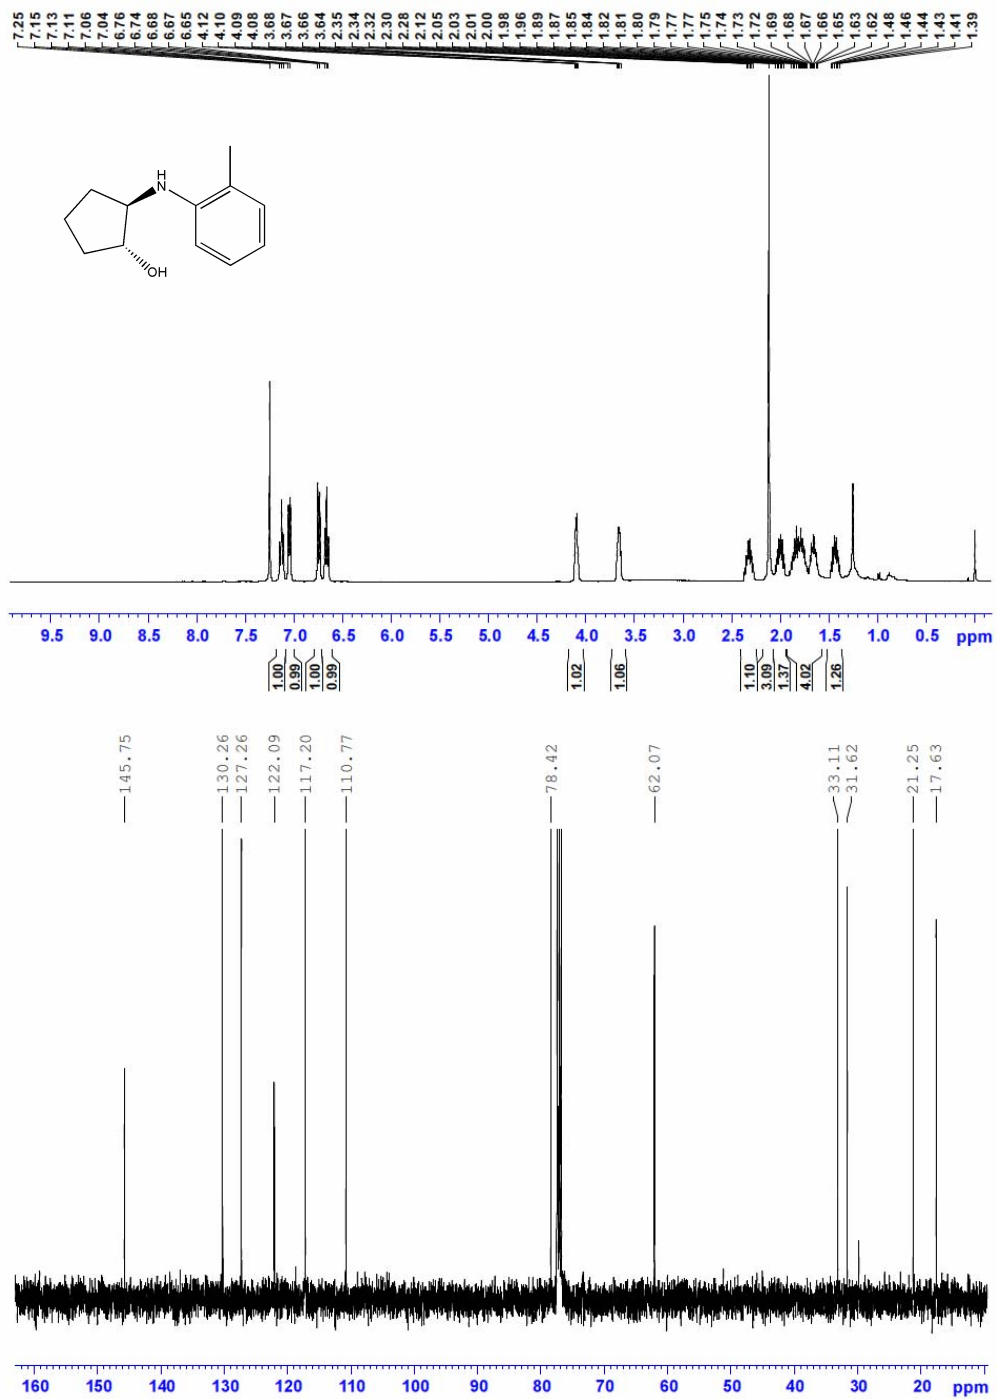

Supplement: c4nj01898b1.pdf [file c4nj01898b1.pdf]
